# Supplementary material
Source: Elsevier journal article supplement (https://www.sciencedirect.com/science/article/pii/S0021755721000991)
Supplement: mmc1 [file S0021755721000991:mmc1.docx]

**JPED-D-21-00111 – Suplementary material**

**Supplementary material 1** - **Inadequate complementary feeding practices of infants fed a cow’s milk protein elimination diet and an unrestricted diet (control group), according to the index of inadequacies in complementary feeding.**

| **Inadequate complementary feeding practices** | **Frequencya** | | |  | **Scoreb** | | |
| --- | --- | --- | --- | --- | --- | --- | --- |
| **Cut-off point age** | **Cow’s milk protein elimination diet group (n = 96)** | **Control group**  **(n = 99)** | **p** | **Cow’s milk protein elimination diet group**  **(n = 96)** | **Control group**  **(n = 99)** | **p** |
| Early introduction of liquidsc | < 6 months  (1,5 points) | 52 (54,2%) | 62 (62,6%) | 0,231 | 1,3 (0,0 -1,3) | 1,3 (0,0 - 1,3) | 0,233 |
| Early introduction of solidsd | < 6 months  (2,0 points) | 36 (37,5%) | 37 (37,4%) | 0,986 | 0,0 (0,0 - 2,0) | 0,0 (0,0 - 2,0) | 0,874 |
| Early introduction of whole cow's milk, yogurt and cheeses | < 12 months  (2,0 points) | 4 (4,2%) | 50 (50,5%) | <0,001 | 0,0 (0,0 - 0,0) | 2,0 (0,0 - 2,0) | < 0,001 |
| Early introduction of sugard | < 24 monthse  (1,5 points) | 34 (35,4%) | 44 (44,4%) | 0,198 | 0,0 (0,0 - 1,5) | 1,5 (0,0 - 1,5) | 0,200 |
| Early introduction of thickener (starches)d | < 12 months  (1,5 points) | 12 (12,5%) | 29 (30,3%) | 0,004 | 0,0 (0,0 - 0,0) | 0,0 (0,0 - 1,5) | 0,003 |
| Early introduction of family’s meal d | < 8 months  (2,0 points) | 1 (1,0%)1 | 7 (7,1%)1 | 0,063 | 0,0 (0,0 - 0,0) | 0,0 (0,0 - 0,0) | 0,460 |
| Late introduction of liquidsc | ≥ 7 months  (0,5 points) | 7 (7,3%) | 3 (3,0%) | 0,209 | 0,0 (0,0 - 0,0) | 0,0 (0,0 - 0,0) | 0,180 |
| Late introduction of solidsd | ≥ 7 months  (1,5 points) | 11 (11,5%) | 3 (3,0%) | 0,023 | 0,0 (0,0 - 0,0) | 0,0 (0,0 - 0,0) | 0,023 |
| Late introduction of family’s meald | > 12 months  (1,5 points) | 19 (19,8%)1 | 11 (11,1%)1 | 0,101 | 0,0 (0,0 - 0,0) | 0,0 (0,0 - 0,0) | 0,481 |
| Inadequacy in preparation of meals | Use of industrialized spice (1,3 points) | 2 (2,7%)1 | 7 (9,6%)1 | 0,166 | 0,0 (0,0-0,0) | 0,0 (0,0-0,0) | 0,099 |
| Index (sum of the scores)d | - | - | - | - | 2,8 (1,3 - 3,5) | 3,5 (1,3 - 5,3) | < 0,001 |

Index of complementary feeding inadequacies by Mais et al., 2014.14

a Values are expressed as the absolute number and percentages in parentheses, Pearson chi-squared test or Fisher Exact test.

b Values are expressed as the median and 25th and 75th percentiles in parentheses, Mann-Whitney test.

Available data: n = 73.1

c Liquids other than breast milk or infant formulas

d For calculating the Index, consider 2 points if there was an early introduction of solids and/or family food; 1.5 points if there was an early introduction of sugar and/or thickener; 1.5 points if there was a late introduction of solids and/or family food.

e Data adapted to the new recommendation for the introduction of sugar on the Brazilian feeding guide for children under 2 years old (2019).7

**Supplementary material 2 - Daily energy and macronutrient intake (A) and Percentage contribution of energy and macronutrients provided by breast milk, formulas, and cow's milk (B), of infants, fed a cow’s milk protein elimination diet and an unrestricted diet (control group).**

**(A) Estimated daily energy and macronutrient intake**

*p=0,011*

*p<0,001*

*p=0,002*

*p<0,001*

**(B) Percentage contribution of energy and macronutrients provided by breast milk, formulas and cow's milk**

*p=0,011*

*p<0,001*

*p=0,002*

*p<0,001*

Values are expressed as the median, Mann-Whitney test.
